# Supplementary material for: On the performance of FAU and MFI zeolites for the adsorptive removal of a series of volatile organic compounds from air using molecular simulation
Source: Royal Society of Chemistry journal article supplement (doi:10.1039/c5cp04265h), 2015-01-01
Supplement: c5cp04265h1.pdf [file c5cp04265h1.pdf]

**On the performance of FAU and MFI zeolites for the adsorptive  
removal of a series of Volatile Organic Compounds from air  
using molecular simulation**

S. Calero and P. Gómez-Álvarez\*

Department of Physical, Chemical and Natural Systems. Universidad Pablo de Olavide.

ES-41013 Seville, Spain

\*Email: [pgomalv1@upo.es](mailto:pgomalv1@upo.es)

**Table S1** Force field parameters used in this work.

▪ **VOCs: propane, propene, butane, 1-butene**

✓ Intermolecular interactions: Lennard-Jones parameters<sup>[1]</sup> ( $\sigma_{ij}$  in Å and  $\epsilon_{ij}/k_B$  in K)

|                                    | O             |                     | CH <sub>3</sub> (sp <sup>3</sup> ) |                     | CH <sub>2</sub> (sp <sup>3</sup> ) |                     | CH <sub>2</sub> (sp <sup>2</sup> ) |                     | CH(sp <sup>2</sup> ) |                     |
|------------------------------------|---------------|---------------------|------------------------------------|---------------------|------------------------------------|---------------------|------------------------------------|---------------------|----------------------|---------------------|
|                                    | $\sigma_{ij}$ | $\epsilon_{ij}/k_B$ | $\sigma_{ij}$                      | $\epsilon_{ij}/k_B$ | $\sigma_{ij}$                      | $\epsilon_{ij}/k_B$ | $\sigma_{ij}$                      | $\epsilon_{ij}/k_B$ | $\sigma_{ij}$        | $\epsilon_{ij}/k_B$ |
| CH <sub>3</sub> (sp <sup>3</sup> ) | 3.48          | 93                  | 3.76                               | 108                 | 3.86                               | 77.77               | 3.72                               | 100.22              | 3.75                 | 75.66               |
| CH <sub>2</sub> (sp <sup>3</sup> ) | 3.58          | 60.5                | 3.86                               | 77.77               | 3.96                               | 56                  | 3.82                               | 72.17               | 3.85                 | 54.48               |
| CH <sub>2</sub> (sp <sup>2</sup> ) | <b>3.53</b>   | <b>82.05</b>        | 3.72                               | 100.22              | 3.82                               | 72.17               | <b>3.685</b>                       | <b>93</b>           | 3.71                 | 70.21               |
| CH(sp <sup>2</sup> )               | <b>3.502</b>  | <b>55.215</b>       | 3.75                               | 75.66               | 3.85                               | 54.48               | 3.71                               | 70.21               | <b>3.74</b>          | <b>53</b>           |

✓ Intramolecular interactions<sup>[1,2]</sup>

$$U^{intra} = U^{bond} + U^{bend} + U^{torsion}$$

$$U^{bond} = \frac{1}{2}k_1(r - r_0)^2$$

$$CH_x - CH_x \quad k_1/k_B = 96500 \text{ K/Å}^2 \quad r_0 = 1.54 \text{ Å}$$

Subscript  $x = 2$  or  $3$

$$CH_2 = CH \quad k_1/k_B = 96500 \text{ K/Å}^2 \quad r_0 = 1.33 \text{ Å}$$

$$U^{bend} = \frac{1}{2}k_2(\theta - \theta_0)^2$$

$$CH_x - CH_2 - CH_x \quad k_2/k_B = 62500 \text{ K/rad}^2 \quad \theta_0 = 114^\circ$$

Subscript  $x = 2$  or  $3$

$$CH_2 = CH - CH_x \quad k_2/k_B = 70400 \text{ K/rad}^2 \quad \theta_0 = 119.70^\circ$$

$$U^{torsion} = p_0 + p_1[1 + \cos\phi_{ijkl}] + p_2[1 - \cos 2\phi_{ijkl}] + p_3[1 + \cos 3\phi_{ijkl}]$$

$$CH_3 - CH_2 - CH_2 - CH_3 \quad p_0/k_B = 0.0 \text{ K} \quad p_1/k_B = 335.03 \text{ K}$$

$$p_2/k_B = -68.19 \text{ K} \quad p_3/k_B = 791.32 \text{ K}$$

$$CH_2 = CH - CH_2 - CH_3 \quad p_0/k_B = 688.50 \text{ K} \quad p_1/k_B = 86.36 \text{ K}$$

$$p_2/k_B = -109.77 \text{ K} \quad p_3/k_B = -282.24 \text{ K}$$

[1] B. Liu, B. Smit, F. Rey, S. Valencia, and S. Calero, *J. Phys. Chem. C*, 2008, **112**, 2492-2498 (ref. 20 of the manuscript). It includes parameters for alkanes of the earlier work of Dubbeldam *et al.* [2].

[2] D. Dubbeldam, S. Calero, T. J. H. Vlugt, R. Krishna, T. L. M. Maesen, and B. Smit, *J. Phys. Chem. B.*, 2004, **108**, 12301-12313 (ref. 19 of the manuscript).

▪ **Nitrogen N<sub>2</sub>, Oxygen O<sub>2</sub>, and Argon Ar**

✓ Point charges and Lennard-Jones (L-J) parameters

| Atom                    | Charge / e <sup>-</sup> | L-J parameters <sup>[3]</sup> |                     | Cross L-J parameters<br>with O <sub>zeo</sub> <sup>[4]</sup> |                     |
|-------------------------|-------------------------|-------------------------------|---------------------|--------------------------------------------------------------|---------------------|
|                         |                         | $\epsilon/\kappa_B/K$         | $\sigma/\text{\AA}$ | $\epsilon/\kappa_B/K$                                        | $\sigma/\text{\AA}$ |
| N (N <sub>2</sub> )     | -0.405                  | 38.298                        | 3.306               | 60.58                                                        | 3.261               |
| Dummy (N <sub>2</sub> ) | 0.810                   | -                             | -                   | -                                                            | -                   |
| O (O <sub>2</sub> )     | -0.112                  | 53.023                        | 3.045               | 65.189                                                       | 3.129               |
| Dummy (O <sub>2</sub> ) | 0.224                   | -                             | -                   | -                                                            | -                   |
| Ar                      | -                       | 124.070                       | 3.380               | 107.69                                                       | 3.15                |

[3] A. Martin-Calvo, E. García-Pérez, A. García-Sánchez, R. Bueno-Pérez, S. Hamad, and S. Calero, *Phys. Chem. Chem. Phys.*, 2011, **13**, 11165-74 (ref. 17 of the manuscript).

[4] A. Martin-Calvo, J. J. Gutiérrez-Sevillano, J. B. Parra, C. O. Ania, and S. Calero, *Phys. Chem. Chem. Phys.*, 2015, DOI: 10.1039/C5CP03749B (ref. 18 of the manuscript).
